# Supplementary material for: Mendelian randomization analysis of celiac GWAS reveals a blood expression signature with diagnostic potential in absence of gluten consumption
Source: PubMed Central journal article supplement — Hum Mol Genet. 2019 May 25;28(18):3037–42. doi: 10.1093/hmg/ddz113 (PMC6737291; doi:10.1093/hmg/ddz113), 2019-05-25
Supplement: suppfile1_ddz113.pdf [file suppfile1_ddz113.pdf]

# AHSA2

GSE113469 / GPL10558 / ILMN\_1798308

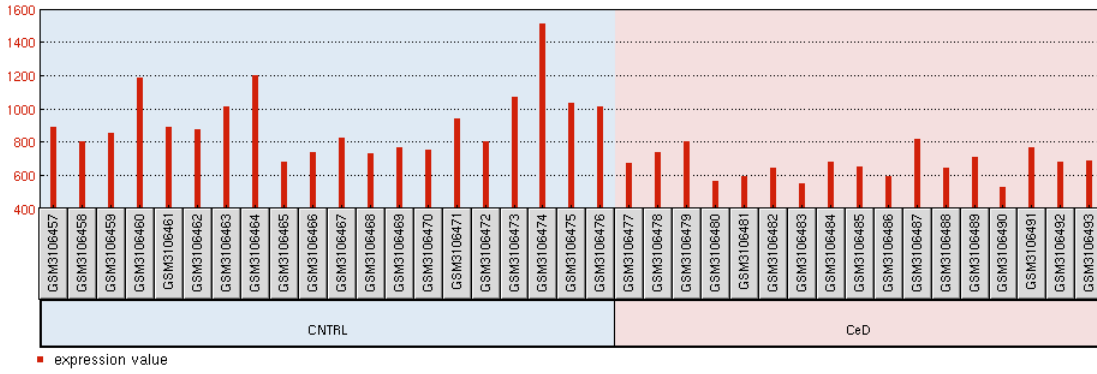

p=1.63225e-05

# BACH2

GSE113469 / GPL10558 / ILMN\_1659943

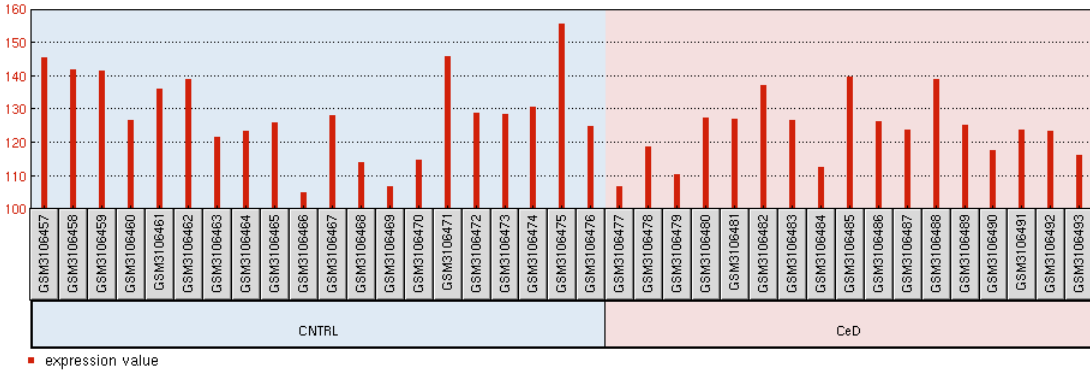

p=0.15256041

GSE113469 / GPL10558 / ILMN\_2058468

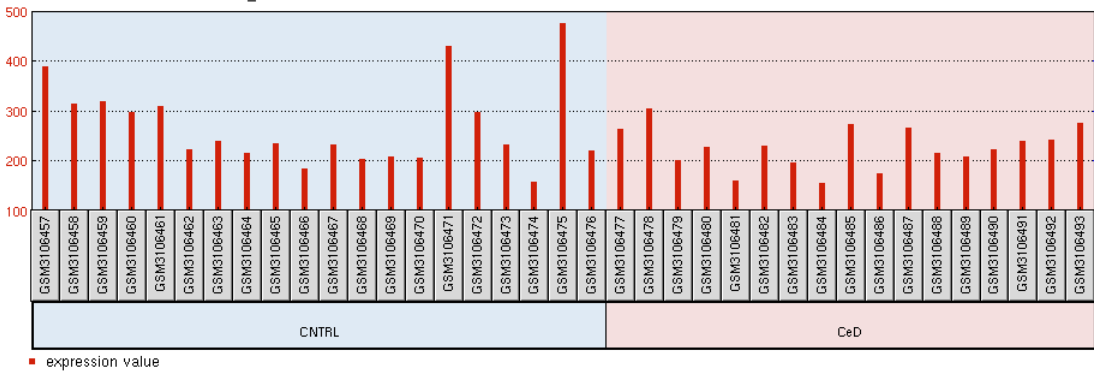

p=0.06452452

GSE113469 / GPL10558 / ILMN\_1670695

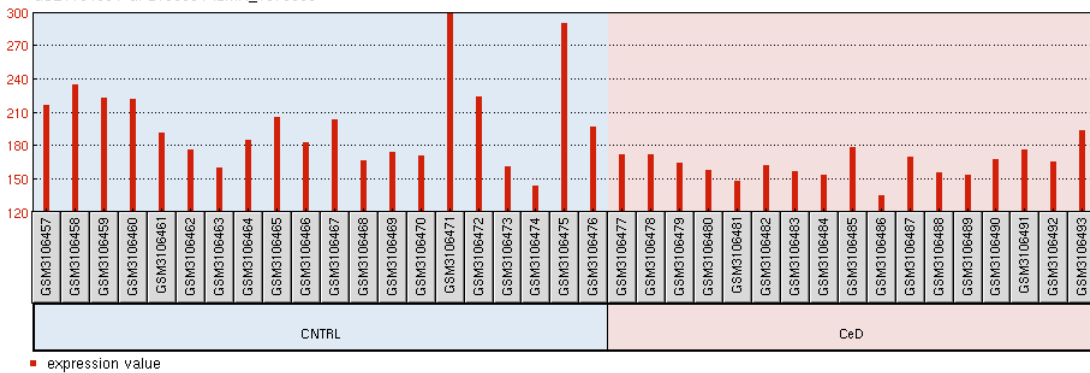

p=0.00081548

# CD247

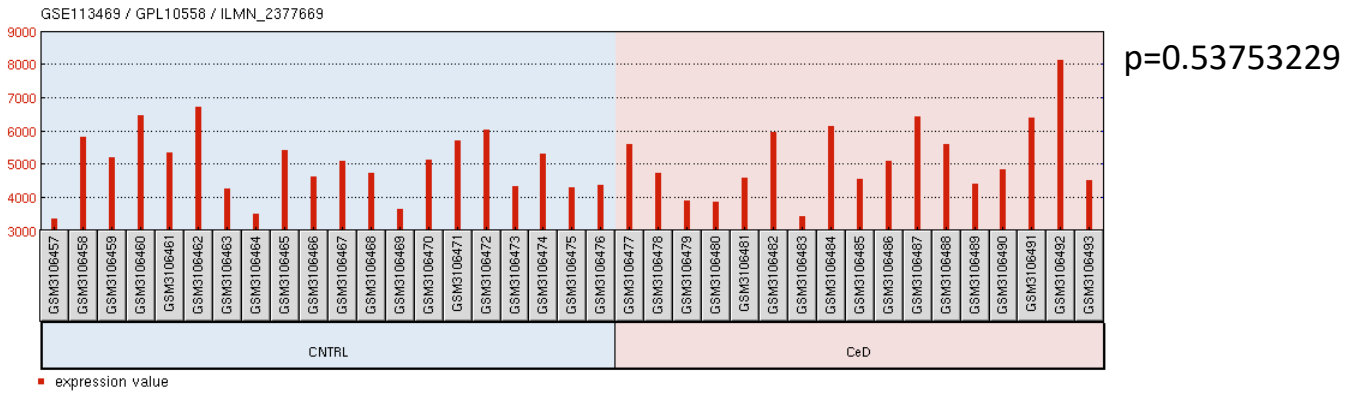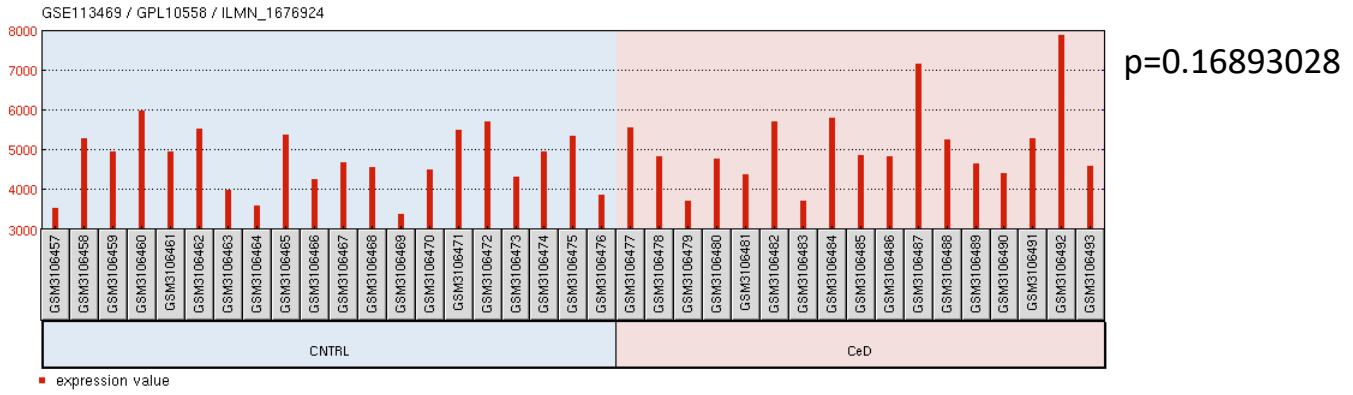

# CDC73

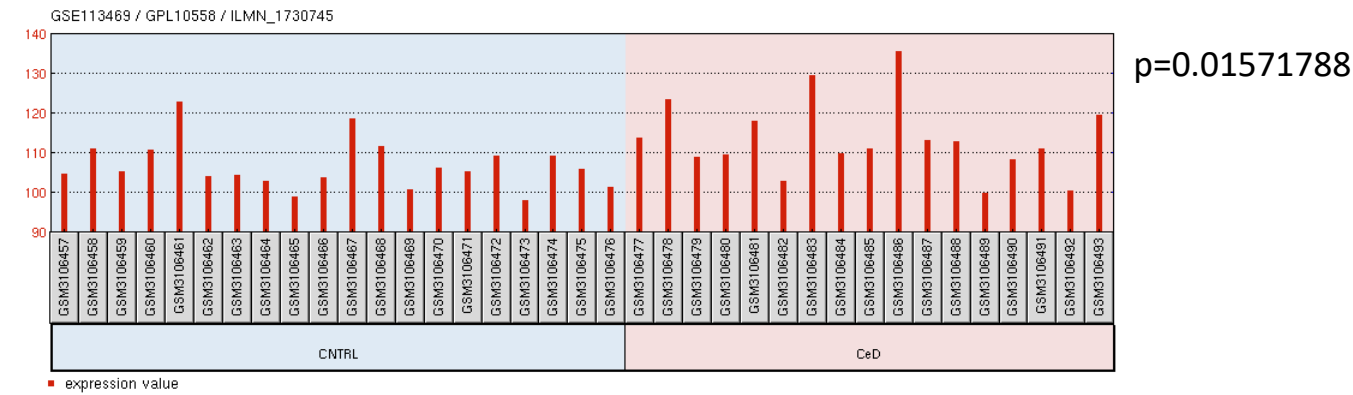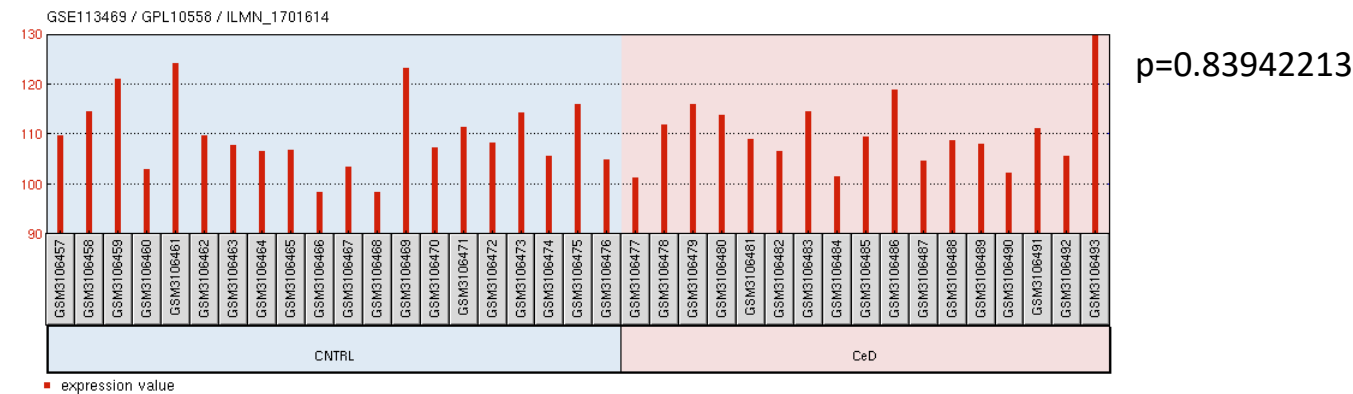

# CCDC116

GSE113469 / GPL10558 / ILMN\_1795085

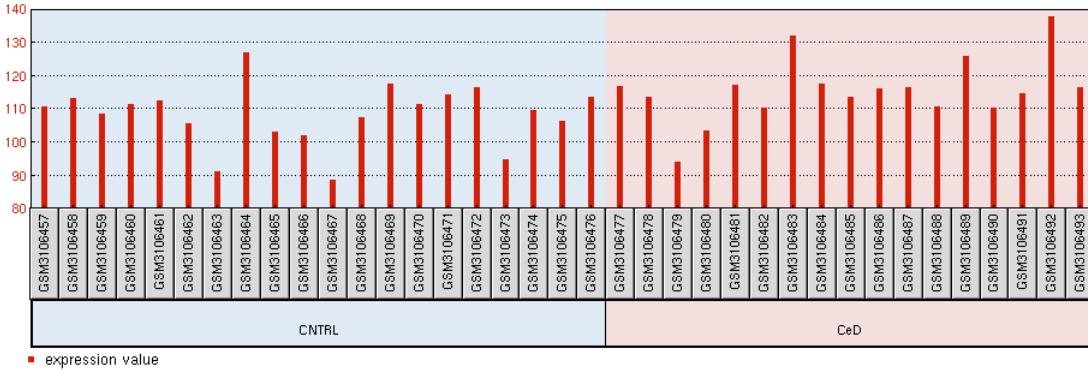

p=0.022753102

# MMEL1

GSE113469 / GPL10558 / ILMN\_2151241

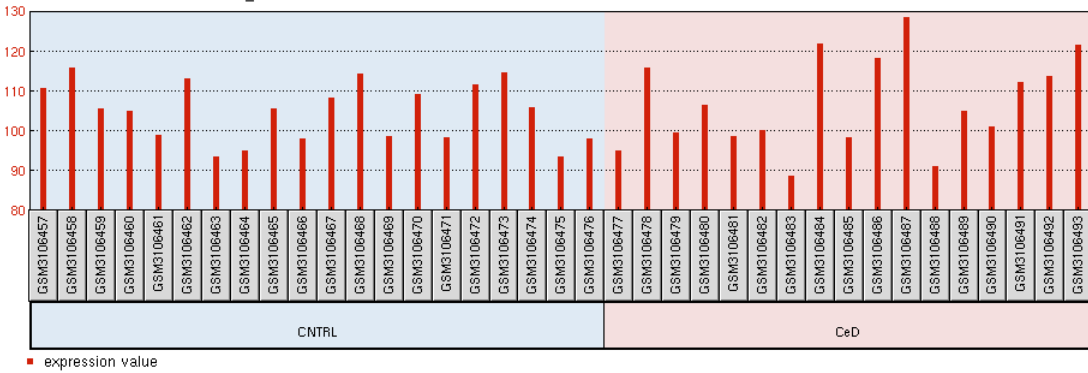

p=0.50238488

GSE113469 / GPL10558 / ILMN\_1718488

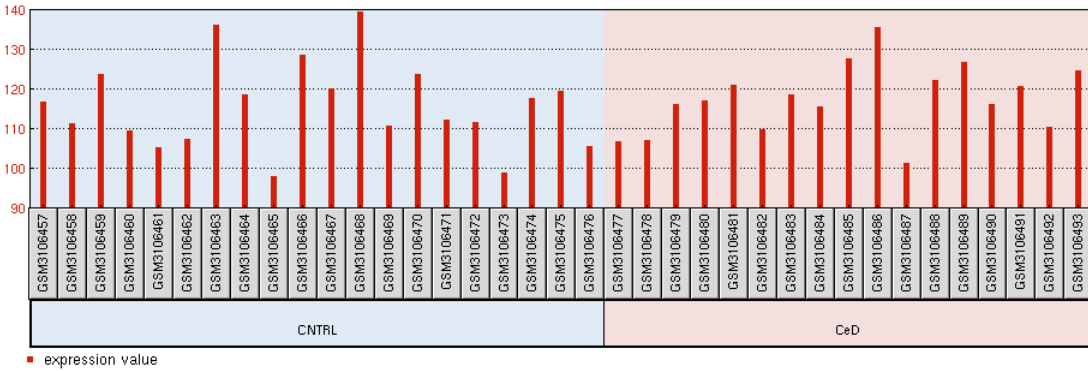

p=0.59727984
